# Supplementary material
Source: Royal Society of Chemistry journal article supplement (doi:10.1039/d5su00971e)
Supplement: d5su00971e1.pdf [file d5su00971e1.pdf]

## Supporting Information

### Mechanochemistry in the Undergraduate Teaching Laboratory

John R. De Backere,<sup>\*a</sup> and Edward P. Zovinka<sup>\*b</sup>

<sup>a</sup> Department of Chemistry, University of Toronto, Toronto, Canada.

<sup>b</sup> Department of Chemistry, Saint Francis University, Loretto, PA, USA.

**Table S1** – Undergraduate mechanochemistry teaching experiments published from 2010-2025,<sup>a</sup> ordered as discussed in main article, briefly summarizing mechanochemical reaction/experiment type, milling method, solvents in workup, and where appropriate the approach to green chemistry student assessments.

| Year | First author, last name | Ref. # | Mechanochemical reaction type/summary                                                 | Mechanochemical Method(s) <sup>b</sup>                                                                     | Solvent(s) for workup(s)              | Green chemistry assessment(s) <sup>c</sup>                                                    |
|------|-------------------------|--------|---------------------------------------------------------------------------------------|------------------------------------------------------------------------------------------------------------|---------------------------------------|-----------------------------------------------------------------------------------------------|
| 2015 | <i>Golstein</i>         | 23     | reductive amination                                                                   | manual grinding (15 min. & 30 min.)                                                                        | ethyl acetate, ethanol                | pre-/post-question(s)                                                                         |
| 2018 | <i>Cunha</i>            | 29     | chlorination of acetanilide                                                           | manual grinding (10 min.)<br>or<br>PM (1.5h, 500 rpm)                                                      | ethyl acetate, water, ethanol         | metrics ( <i>E-factor</i> ), comparison(s)                                                    |
| 2019 | <i>Colacino</i>         | 30     | sulfonylureas by catalytic coupling                                                   | Neat or LAG (CH <sub>3</sub> NO <sub>2</sub> ); MM (2h, 30 Hz)<br>or<br>PM (2h, 450 rpm)                   | water                                 | metrics ( <i>AE</i> , <i>E-factor</i> ), comparison(s)                                        |
| 2019 | <i>Mancheno</i>         | 31     | covalent organic framework (COF)                                                      | manual grinding (5 min. & 15 min. LAG(H <sub>2</sub> O))                                                   | water, methanol, THF                  |                                                                                               |
| 2019 | <i>Bastin</i>           | 24     | amine acylation                                                                       | manual grinding (10 min., pre-heated)                                                                      | ethyl acetate                         | pre-/post-lab question(s), metrics ( <i>AE</i> , <i>EMY</i> , <i>E-factor</i> ) comparison(s) |
| 2022 | <i>Jordan</i>           | 25     | chalcone by aldol condensation                                                        | manual grinding (~10 min.)                                                                                 | water, ethanol                        | pre-/post-question(s)                                                                         |
| 2024 | <i>Neto</i>             | 34     | ketone $\alpha$ -bromination and synthesis of 2-phenylimidazo[1,2- $\alpha$ ]pyridine | manual grinding (30 min. & 30 min.)<br>or<br>home-made vortex mill (5 min. & 5 min.)                       | ethyl acetate, water, acetone, hexane |                                                                                               |
| 2025 | <i>Ma</i>               | 35     | base-catalyzed synthesis of a thiazoline heterocycle                                  | manual grinding (10 min.)                                                                                  | ethanol                               | pre-/post-question(s)                                                                         |
| 2025 | <i>Pokharel</i>         | 36     | reduction of acetylferrocene to ( $\pm$ )-1-ferrocenylethanol                         | microwave (30 sec.) followed by manual grinding (5 min.); $\times 3$<br>or<br>RT manual grinding (20 min.) | ethyl acetate, water                  | pre-/post-question(s)                                                                         |

continued on page S2...

Table S1 continued...

|      |                  |    |                                                                                                      |                                                                                |                                              |                                                                |
|------|------------------|----|------------------------------------------------------------------------------------------------------|--------------------------------------------------------------------------------|----------------------------------------------|----------------------------------------------------------------|
| 2025 | Shunnar          | 38 | (1) Cu-NHC synthesis, (2) transmetalation to Au-NHC, (3) Cu-NHC catalyzed Sonogashira cross-coupling | (1) MM (30 min., 25 Hz) x2<br>(2) MM (30 min., 25 Hz) x2<br>(3) MM (1h, 25 Hz) | (1) & (2) acetone, pentane<br>(3) water, DCM | pre-/post-lab question(s), metrics (AE, RME, OE, MI, E-factor) |
| 2010 | Berry            | 40 | Pd phosphine dimer complex                                                                           | home-made stirrer mill (24 h)                                                  | DCM                                          |                                                                |
| 2020 | Förster          | 41 | Cu(I)(PPh <sub>3</sub> ) <sub>2</sub> L (L = py or py <sup>CN</sup> )                                | manual LAG(DCM) (~5 min.)                                                      | tert-butyl methyl ether                      | pre-/post-lab question(s)                                      |
| 2020 | Yuan             | 42 | polyoxometalate (POM) guest metal organic framework (POM@MOF) NENU-3                                 | manual LAG(EtOH) (5–10 min.)                                                   | water, ethanol                               |                                                                |
| 2023 | Kraft            | 43 | prussian blue, KFe <sup>III</sup> [Fe <sup>II</sup> (CN) <sub>6</sub> ]                              | manual grinding (up to 5 min.)                                                 |                                              |                                                                |
| 2023 | Nitka            | 44 | metalloporphyrin synthesis                                                                           | MM (5 min., 25 Hz) x3                                                          | ethyl acetate                                | pre-/post-lab question(s)                                      |
| 2023 | Jenkins          | 46 | CuCl <sub>2</sub> to CuO with NaOH                                                                   | manual grinding (a few min.)                                                   | water                                        | comparison(s)                                                  |
| 2023 | Bru              | 47 | Cu-NHC synthesis                                                                                     | manual grinding (30 min. – 1h) or PM (30 min., 400 rpm)                        | DCM, pentane or acetone, heptane/cyclohexane | metrics (AE, E-factor, MI, RME, OE, Green Star), comparison(s) |
| 2024 | Domínguez-Martín | 48 | Zn antibiotic coordination framework (Zn-ACF)                                                        | manual LAG(NH <sub>3(aq)</sub> ) (5 min.)                                      | ethanol                                      |                                                                |
| 2024 | Dong             | 49 | [Ni(Me <sub>3</sub> en)(acac)][BPh <sub>4</sub> ] synthesis                                          | manual grinding (10 min.)                                                      | water                                        |                                                                |
| 2014 | Wixtrom          | 50 | Polymorphs of charge transfer salt tetrathiafulvalene-chloranil (TTF-CA)                             | manual LAG (H <sub>2</sub> O or acetone) (20 min.)                             |                                              | pre-/post-lab question(s), metrics (AE, E-factor)              |
| 2017 | Brown            | 51 | mechanochemical ring-opening of spiropyran (SP) in poly(dimethylsiloxane) (PDMS) elastomer network   | hit with hammer, drag blunt object, pull polymer                               |                                              |                                                                |
| 2021 | Winum            | 52 | tribochromism in Maya blue pigments                                                                  | manual grinding                                                                |                                              |                                                                |
| 2022 | Bychkov          | 53 | degradation of α-cellulose biopolymer                                                                | PM (0 to 960s, 1.1 kW nominal motor power)                                     |                                              |                                                                |
| 2023 | Silva            | 54 | naproxen-cimetidine co-amorphous system (NPX-CIM)                                                    | MM (60 min., 30 Hz)                                                            |                                              |                                                                |
| 2023 | Hu               | 55 | 2D MoS <sub>2</sub> nanosheets                                                                       | PM (24 h, 580 rpm)                                                             | water                                        |                                                                |
| 2024 | Wang             | 56 | computational COGEF (constrained geometries simulate external force) method                          |                                                                                |                                              |                                                                |

<sup>a</sup> References 27 and 28, which are book chapters proposing several different mechanochemical syntheses selected from the primary literature are not included or discussed.

<sup>b</sup> Abbreviations: PM (planetary mill), MM (mixer mill), LAG (liquid-assisted grinding)

<sup>c</sup> The term “comparison(s)” refers to students comparing the mechanochemical route to alternative syntheses, such as solution-based methods, with an emphasis on green chemistry principles. Blank box means no green chemistry assessments were explicitly reported by the original authors relating to specifically to mechanochemistry.
